# Supplementary material for: Improving the performance for direct electrolysis of CO2 in solid oxide electrolysis cells with a Sr1.9Fe1.5Mo0.5O6−δ electrode via infiltration of Pr6O11 nanoparticles
Source: Royal Society of Chemistry journal article supplement (doi:10.1039/d3ta00186e), 2023-01-01
Supplement: d3ta00186e1.pdf [file d3ta00186e1.pdf]

## Electronic Supplementary Information

# Improving the Performance for Direct Electrolysis of CO<sub>2</sub> in Solid Oxide Electrolysis Cell with Sr<sub>1.9</sub>Fe<sub>1.5</sub>Mo<sub>0.5</sub>O<sub>6-δ</sub> Electrode via Infiltration of Pr<sub>6</sub>O<sub>11</sub> Nanoparticles

Wanhua Wang<sup>a</sup>, Haixia Li<sup>a</sup>, Clarita Y. Regalado Vera<sup>b,c</sup>, Jie Lin<sup>a</sup>, Ka-Young Park<sup>a</sup>, Taehee Lee<sup>a</sup>, Dong Ding<sup>\*b</sup>  
and Fanglin Chen<sup>\*a</sup>

<sup>a</sup>Department of Mechanical Engineering, University of South Carolina, Columbia, SC, 29208, USA.

<sup>b</sup>Energy & Environmental Science and Technology, Idaho National Laboratory, Idaho Falls, ID, 83415, USA.

<sup>c</sup>Department of Chemical & Materials Engineering, New Mexico state University, Las Cruces, NM, 88003, USA.

\*Corresponding author: Email: [dong.ding@inl.gov](mailto:dong.ding@inl.gov) (D. D.); [chenfa@cec.sc.edu](mailto:chenfa@cec.sc.edu) (F. C.)

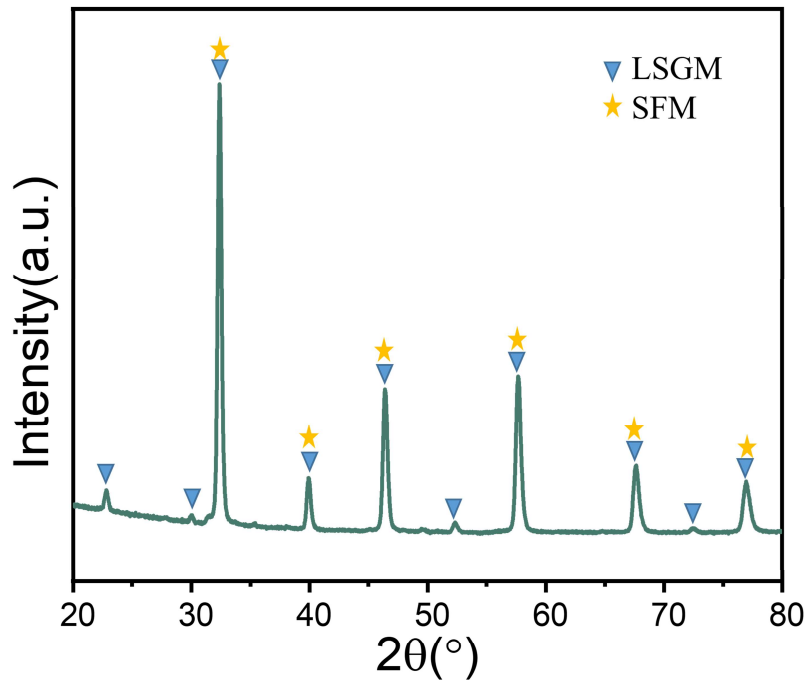

Figure S1. XRD profiles of the mixture powder of 50wt.%SFM with 50wt.%LSGM treated in air at 1000°C for 2h.

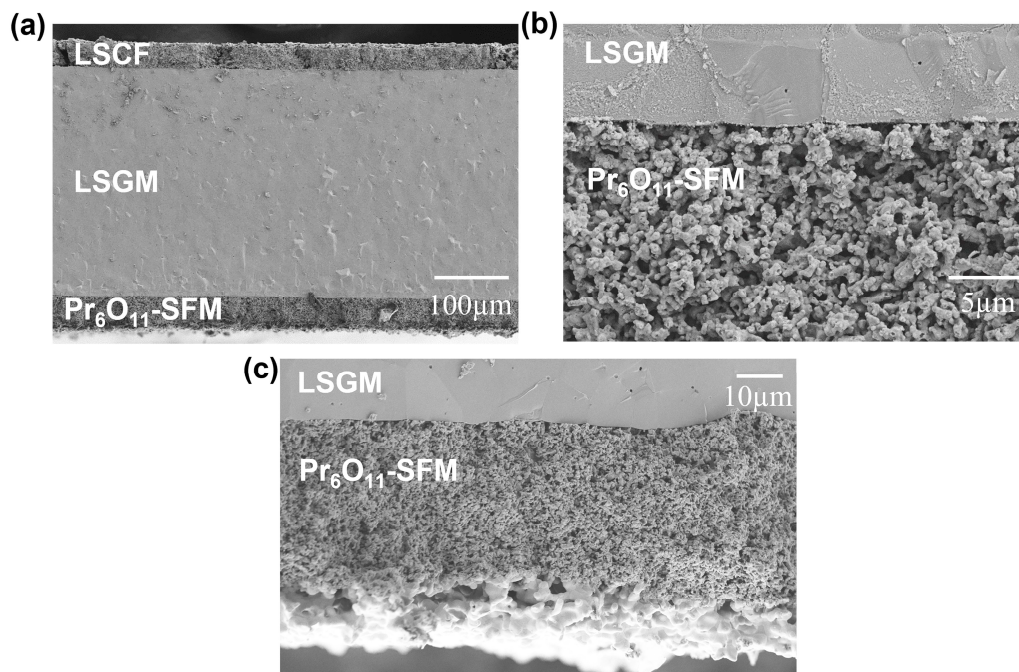

Figure S2. Cross-sectional microstructure of 14.8wt.%Pr<sub>6</sub>O<sub>11</sub>-SFM single cell. (a) The cross-section view of the entire cell, (b) the magnified cathode/electrolyte view before testing, (c) the cathode/electrolyte interface after long-term stability testing.

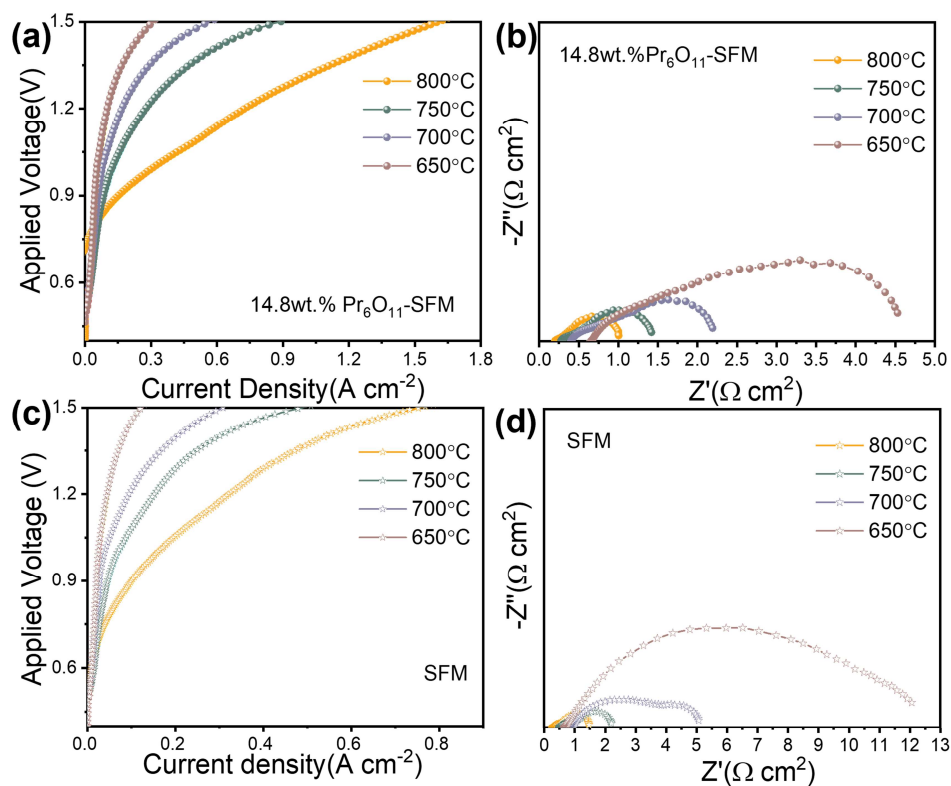

Figure S3. CO<sub>2</sub> electrolysis performance comparison of single cells with SFM and 14.8wt.%Pr<sub>6</sub>O<sub>11</sub>-SFM cathode, respectively. I-V curves (a) and EIS results (b) of 14.8wt.%Pr<sub>6</sub>O<sub>11</sub>-SFM single cells at different temperature. I-V curves (c) and EIS results (d) of SFM single cells at different temperature.

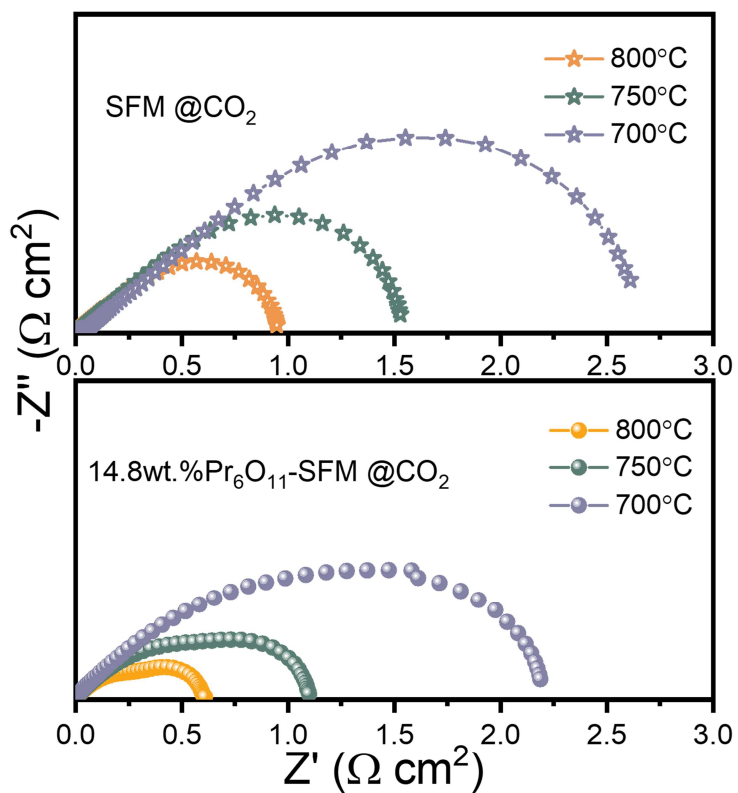

Figure S4. CO<sub>2</sub> electrolysis performance comparison of symmetrical cells with SFM and 14.8wt.%Pr<sub>6</sub>O<sub>11</sub>-SFM electrode at different temperature.

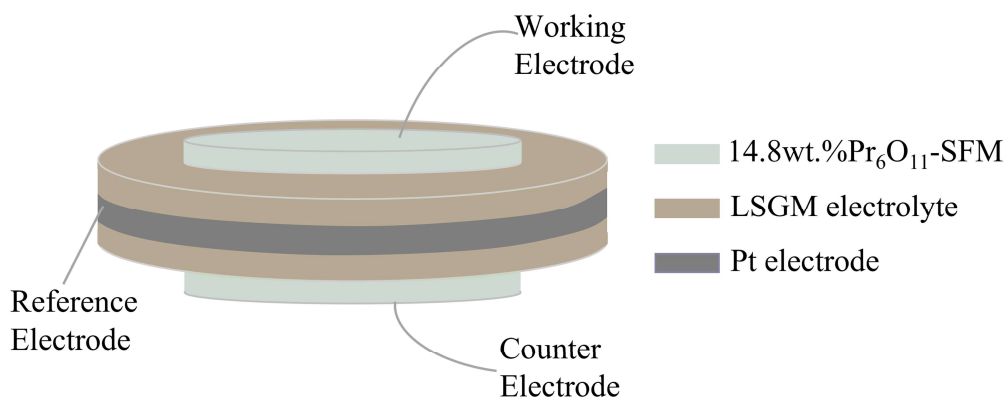

Figure S5. Schematic diagram of three-electrode cell.

Table S1. Performance comparison at 800°C for pure CO<sub>2</sub> electrolysis at 1.5V

| Cell configuration<br>Cathode/Electrolyte/Anode        | Electrolyte<br>thickness (μm) | Current density<br>(A/cm <sup>2</sup> ) at 1.5V | Polarization resistance<br>(Ω cm <sup>2</sup> ) at OCV | Ref.      |
|--------------------------------------------------------|-------------------------------|-------------------------------------------------|--------------------------------------------------------|-----------|
| LSCrM-SDC/YSZ/LSCrM-SDC                                | 2000                          | 0.10                                            | 3.1                                                    | S1        |
| LSFT/YSZ/LSFT                                          | 700                           | 0.28                                            | --                                                     | S2        |
| Ni@LSTM/YSZ/LSM <sup>1</sup> -SDC                      | 500                           | 0.43                                            | --                                                     | S3        |
| LSFM-GDC/YSZ/LSFM-DC                                   | 200                           | 0.51                                            | 0.85                                                   | S4        |
| LSCFN-GDC/YSZ/LSCFN-GDC                                | 200                           | 0.442                                           | 0.683                                                  | S5        |
| LSFN-GDC/YSZ/LSFN-GDC                                  | 400                           | 0.55                                            | 0.12                                                   | S6        |
| LSTMC/LSGM/LSM <sup>2</sup>                            | 350                           | 1.24                                            | 0.311                                                  | S7        |
| LSF/LSGM/LSCF-SDC                                      | 240                           | 0.76                                            | 1.31                                                   | S8        |
| 12.8wt.%GDC-SFM/YSZ/LSM <sup>3</sup> -YSZ              | 500                           | 0.45                                            | --                                                     | S9        |
| SFM-YSZ/YSZ/LSM-YSZ                                    | 10                            | 1.10                                            | 0.41                                                   | S10       |
| SFM-SDC/LSGM/LSCF-SDC                                  | 230                           | 1.09                                            | 0.512                                                  | S11       |
| F-SFM/LSGM/LSCF-SDC                                    | 250                           | 1.36                                            | 0.656                                                  | S12       |
| SFMM-SDC/LSGM/LSCF-SDC                                 | 400                           | 1.35                                            | 0.58                                                   | S13       |
| SFM/LSGM/LSCF                                          | 310                           | 0.76                                            | 1.38                                                   | This work |
| 14.8wt.%Pr <sub>6</sub> O <sub>11</sub> -SFM/LSGM/LSCF | 310                           | 1.61                                            | 0.81                                                   | This work |

LSCrM=La<sub>0.75</sub>Sr<sub>0.25</sub>Cr<sub>0.5</sub>Mn<sub>0.5</sub>O<sub>3-δ</sub>; SDC=Ce<sub>0.8</sub>Sm<sub>0.2</sub>O<sub>2-δ</sub>; GDC=Ce<sub>0.8</sub>Sm<sub>0.2</sub>O<sub>2-δ</sub>; LSFT= La<sub>0.3</sub>Sr<sub>0.7</sub>Fe<sub>0.7</sub>TiO<sub>3-δ</sub>; LSTM= La<sub>0.2</sub>Sr<sub>0.8</sub>Ti<sub>0.9</sub>Mn<sub>0.1</sub>O<sub>3+δ</sub>; LSM<sup>1</sup>= (La<sub>0.8</sub>Sr<sub>0.2</sub>)<sub>0.95</sub>MnO<sub>3-δ</sub>; LSFM= La<sub>0.6</sub>Sr<sub>0.4</sub>Fe<sub>0.9</sub>Mn<sub>0.1</sub>O<sub>3-δ</sub>; LSCF=La<sub>0.6</sub>Sr<sub>0.4</sub>Co<sub>0.2</sub>Fe<sub>0.8</sub>O<sub>3-δ</sub>; LSCFN=La<sub>0.4</sub>Sr<sub>0.6</sub>Co<sub>0.2</sub>Fe<sub>0.7</sub>Nb<sub>0.1</sub>O<sub>3-δ</sub>; LSTMC=(La<sub>0.2</sub>Sr<sub>0.8</sub>)<sub>0.95</sub>Ti<sub>0.55</sub>Mn<sub>0.35</sub>Cu<sub>0.1</sub>O<sub>3-δ</sub>; LSM<sup>2</sup>=La<sub>0.8</sub>Sr<sub>0.2</sub>MnO<sub>3-δ</sub>; LSF=La<sub>0.8</sub>Sr<sub>0.2</sub>FeO<sub>3-δ</sub>; SFM= Sr<sub>2</sub>Fe<sub>1.5</sub>Mo<sub>0.5</sub>O<sub>6-δ</sub>; LSM<sup>3</sup>= (La<sub>0.85</sub>Sr<sub>0.15</sub>)<sub>0.9</sub>MnO<sub>3-δ</sub>; F-SFM=F-Sr<sub>2</sub>Fe<sub>1.5</sub>Mo<sub>0.5</sub>O<sub>6-δ</sub>; SFMM=Sr<sub>2</sub>Fe<sub>1.4</sub>Mn<sub>0.1</sub>Mo<sub>0.5</sub>O<sub>6-δ</sub>;

Table S2: Polarization resistance values of 14.8wt.%Pr<sub>6</sub>O<sub>11</sub>-SFM and SFM electrodes under open circuit conditions in pure CO<sub>2</sub> atmosphere at different temperatures

| Electrode                                    | R <sub>p</sub> (Ω cm <sup>2</sup> ) at 800°C | R <sub>p</sub> (Ω cm <sup>2</sup> ) at 750°C | R <sub>p</sub> (Ω cm <sup>2</sup> ) at 700°C |
|----------------------------------------------|----------------------------------------------|----------------------------------------------|----------------------------------------------|
| 14.8wt.%Pr <sub>6</sub> O <sub>11</sub> -SFM | 0.61                                         | 1.09                                         | 2.18                                         |
| SFM                                          | 0.95                                         | 1.53                                         | 2.62                                         |

## Notes and references

- S1. S. Xu, S. Li, W. Yao, D. Dong and K. Xie, *J. Power Sources*, 2013, **230**, 115–121.
- S2. Z. Cao, B. Wei, J. Miao, Z. Wang, Z. Lü, W. Li, Y. Zhang, X. Huang, X. Zhu, Q. Feng and Y. Sui, *Electrochem. commun.*, 2016, **69**, 80–83.
- S3. L. Ye, M. Zhang, P. Huang, G. Guo, M. Hong, C. Li, J. T. S. Irvine and K. Xie, *Nat. Commun.*, 2017, **8**, 1–10.
- S4. X. Peng, Y. Tian, Y. Liu, W. Wang, L. Jia, J. Pu, B. Chi and J. Li, *J. CO2 Util.*, 2020, **36**, 18–24.
- S5. Z. Yang, C. Ma, N. Wang, X. Jin, C. Jin and S. Peng, *J. CO2 Util.*, 2019, **33**, 445–451.
- S6. Y. Tian, H. Zheng, L. Zhang, B. Chi, J. Pu and J. Li, *J. Electrochem. Soc.*, 2018, **165**, F17.
- S7. X. Yang, K. Sun, M. Ma, C. Xu, R. Ren, J. Qiao, Z. Wang, S. Zhen, R. Hou and W. Sun, *Appl. Catal. B Environ.*, 2020, **272**, 118968.
- S8. Y. Yang, Y. Li, Y. Jiang, M. Zheng, T. Hong, X. Wu and C. Xia, *Electrochim. Acta*, 2018, **284**, 159–167.
- S9. H. Lv, Y. Zhou, X. Zhang, Y. Song, Q. Liu, G. Wang and X. Bao, *J. Energy Chem.*, 2019, **35**, 71–78.
- S10. Y. Li, P. Li, B. Hu and C. Xia, *J. Mater. Chem. A*, 2016, **4**, 9236–9243.
- S11. Y. Li, X. Chen, Y. Yang, Y. Jiang and C. Xia, *ACS Sustain. Chem. Eng.*, 2017, **5**, 11403–11412.
- S12. Y. Li, Y. Li, Y. Wan, Y. Xie, J. Zhu, H. Pan, X. Zheng and C. Xia, *Adv. Energy Mater.*, 2019, **9**, 1803156.
- S13. Y. Jiang, Y. Yang, C. Xia and H. J. M. Bouwmeester, *J. Mater. Chem. A*, 2019, **7**, 22939–22949.
